# Supplementary material for: Synthesis of the first sulphur-containing platinum(ii) alkenylarylalkynyl complexes by photoirradiation
Source: Royal Society of Chemistry journal article supplement (doi:10.1039/c4ra01410c), 2014-01-01

Supporting Information

Synthesis of First Sulphur-Containing Platinum(II) Alkenylaryalkynyl Complexes by  
Photoirradiation

Md. Mostafizur Rahman,<sup>a,b\*</sup> Muhammad Younus,<sup>b</sup> and Akiya Ogawa<sup>a</sup>

<sup>a</sup> *Department of Applied Chemistry, Graduate School of Engineering, Osaka Prefecture University, 1-1 Gakuen-cho, Nakaku, Sakai, Osaka 599-8531, Japan;*

<sup>b</sup> *Department of Chemistry, School of Physical Sciences, Shahjalal University of Science and Technology, Sylhet-3114, Bangladesh.*

\* E-mail: mostafiz-che@sust.edu (M. M. Rahman)

## Contents

### <sup>1</sup>H NMR and <sup>31</sup>P NMR spectra for compounds: **2a-2d**

|              |         |
|--------------|---------|
| General      | S 2     |
| 1) <b>2a</b> | S3-S5   |
| 2) <b>2b</b> | S6-S7   |
| 3) <b>2c</b> | S8-S9   |
| 4) <b>2d</b> | S10-S11 |

### General:

NMR spectra were recorded with a JEOL JNM-ECX 400 or JEOL JNM-ECS 400FT NMR spectrometer in deuterated chloroform solvent. <sup>1</sup>H NMR spectra were referenced to internal TMS, and <sup>31</sup>P NMR spectra were referenced to external trimethylphosphite. Deuterated chloroform have trace amount of water and peak observed near 1.57 ppm. Platinum complexes (**2a**, **2c**, **2d**) have trace amount of hexane (peak observed near 0.88 ppm) and complex **2b** have trace amount of dichloromethane (peak observed at 5.28 ppm).<sup>1</sup>

### Reference

1 H. E. Gottlieb, V. Kotlyar and A. Nudelman, *J. Org. Chem.*, 1997, **62**, 7512.

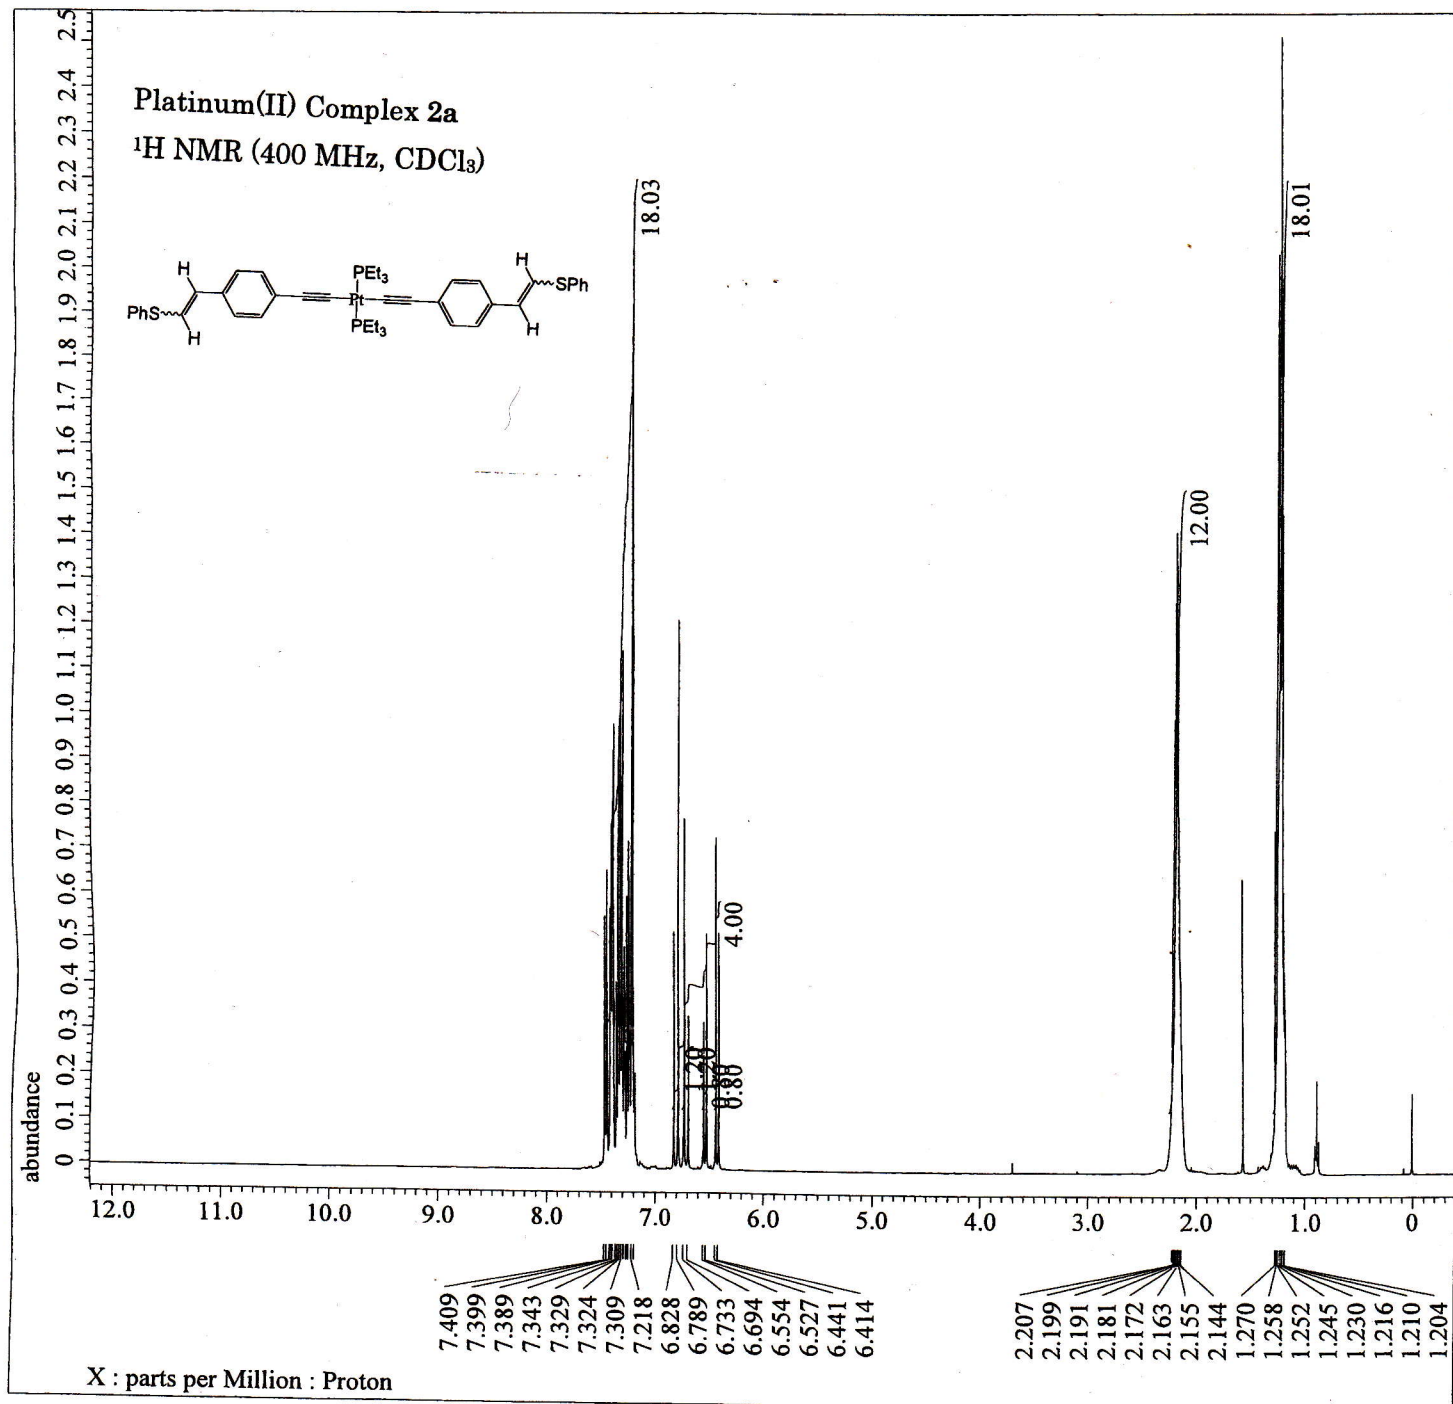

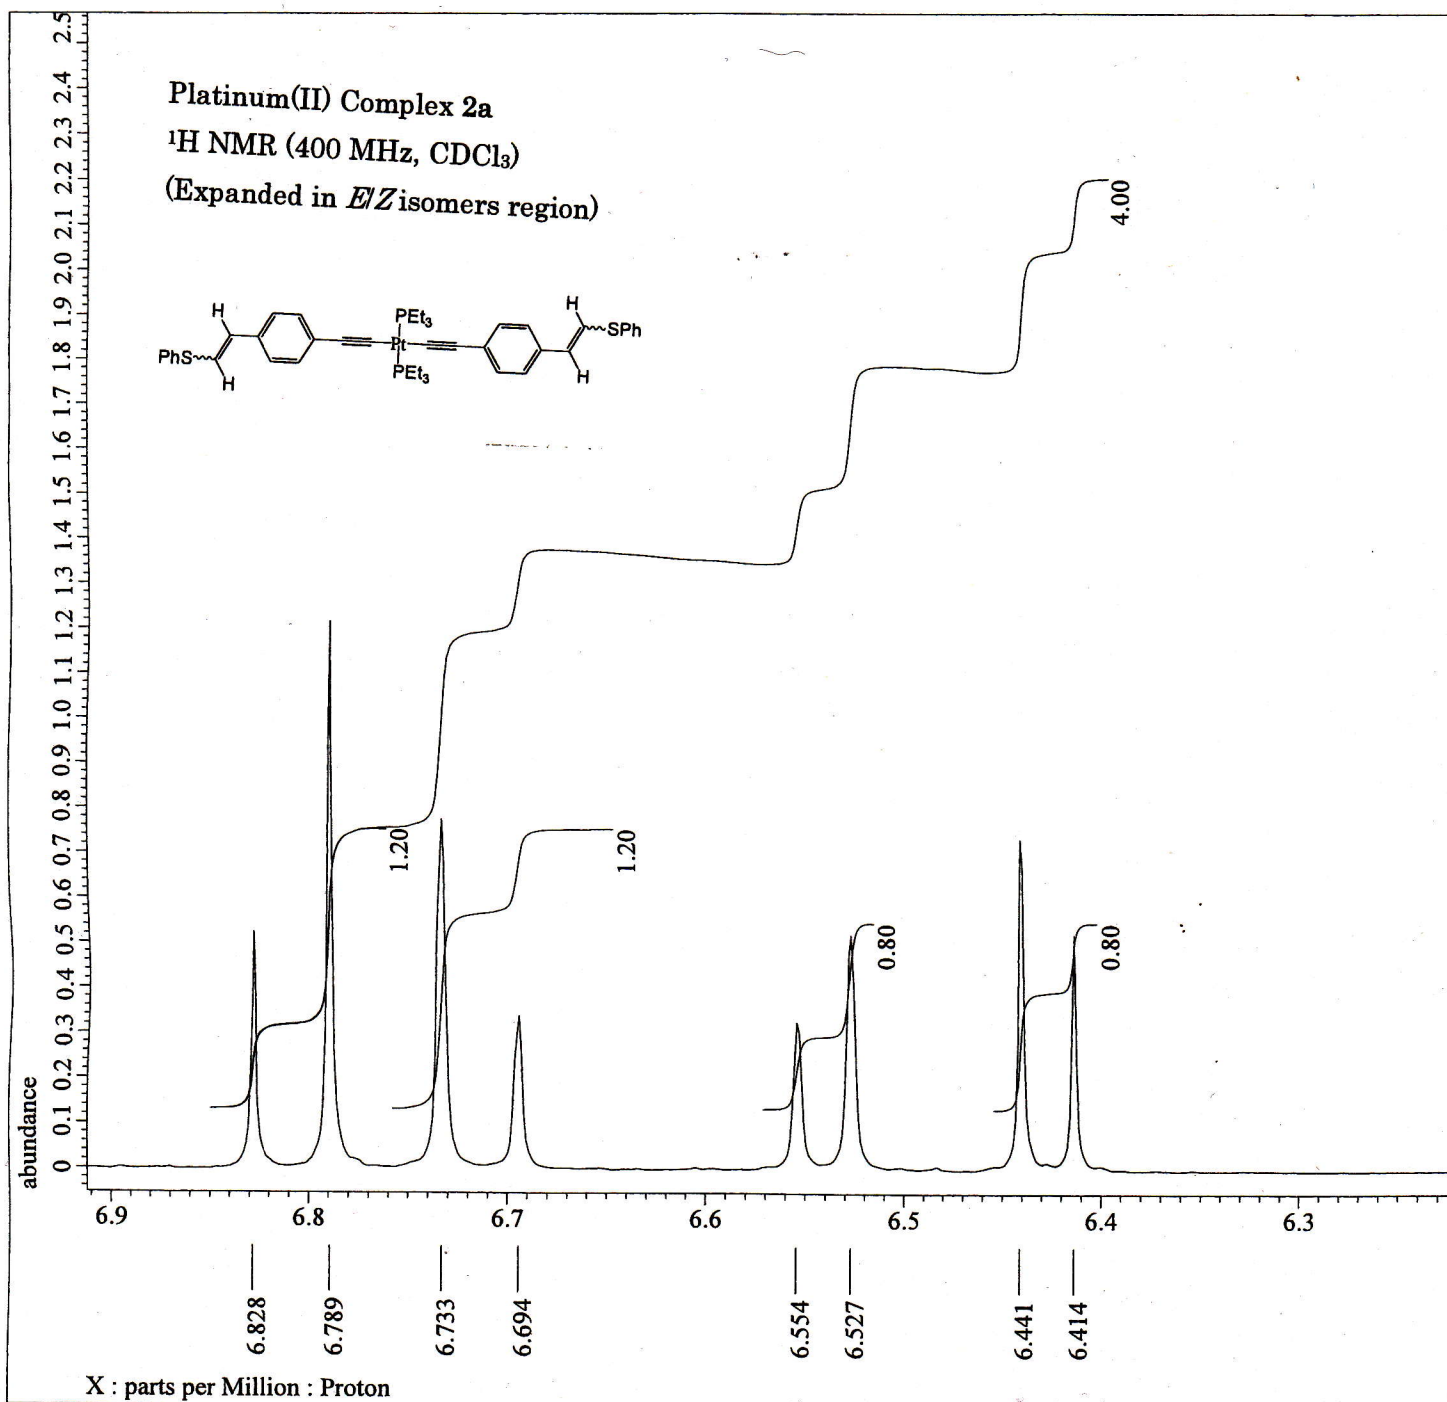

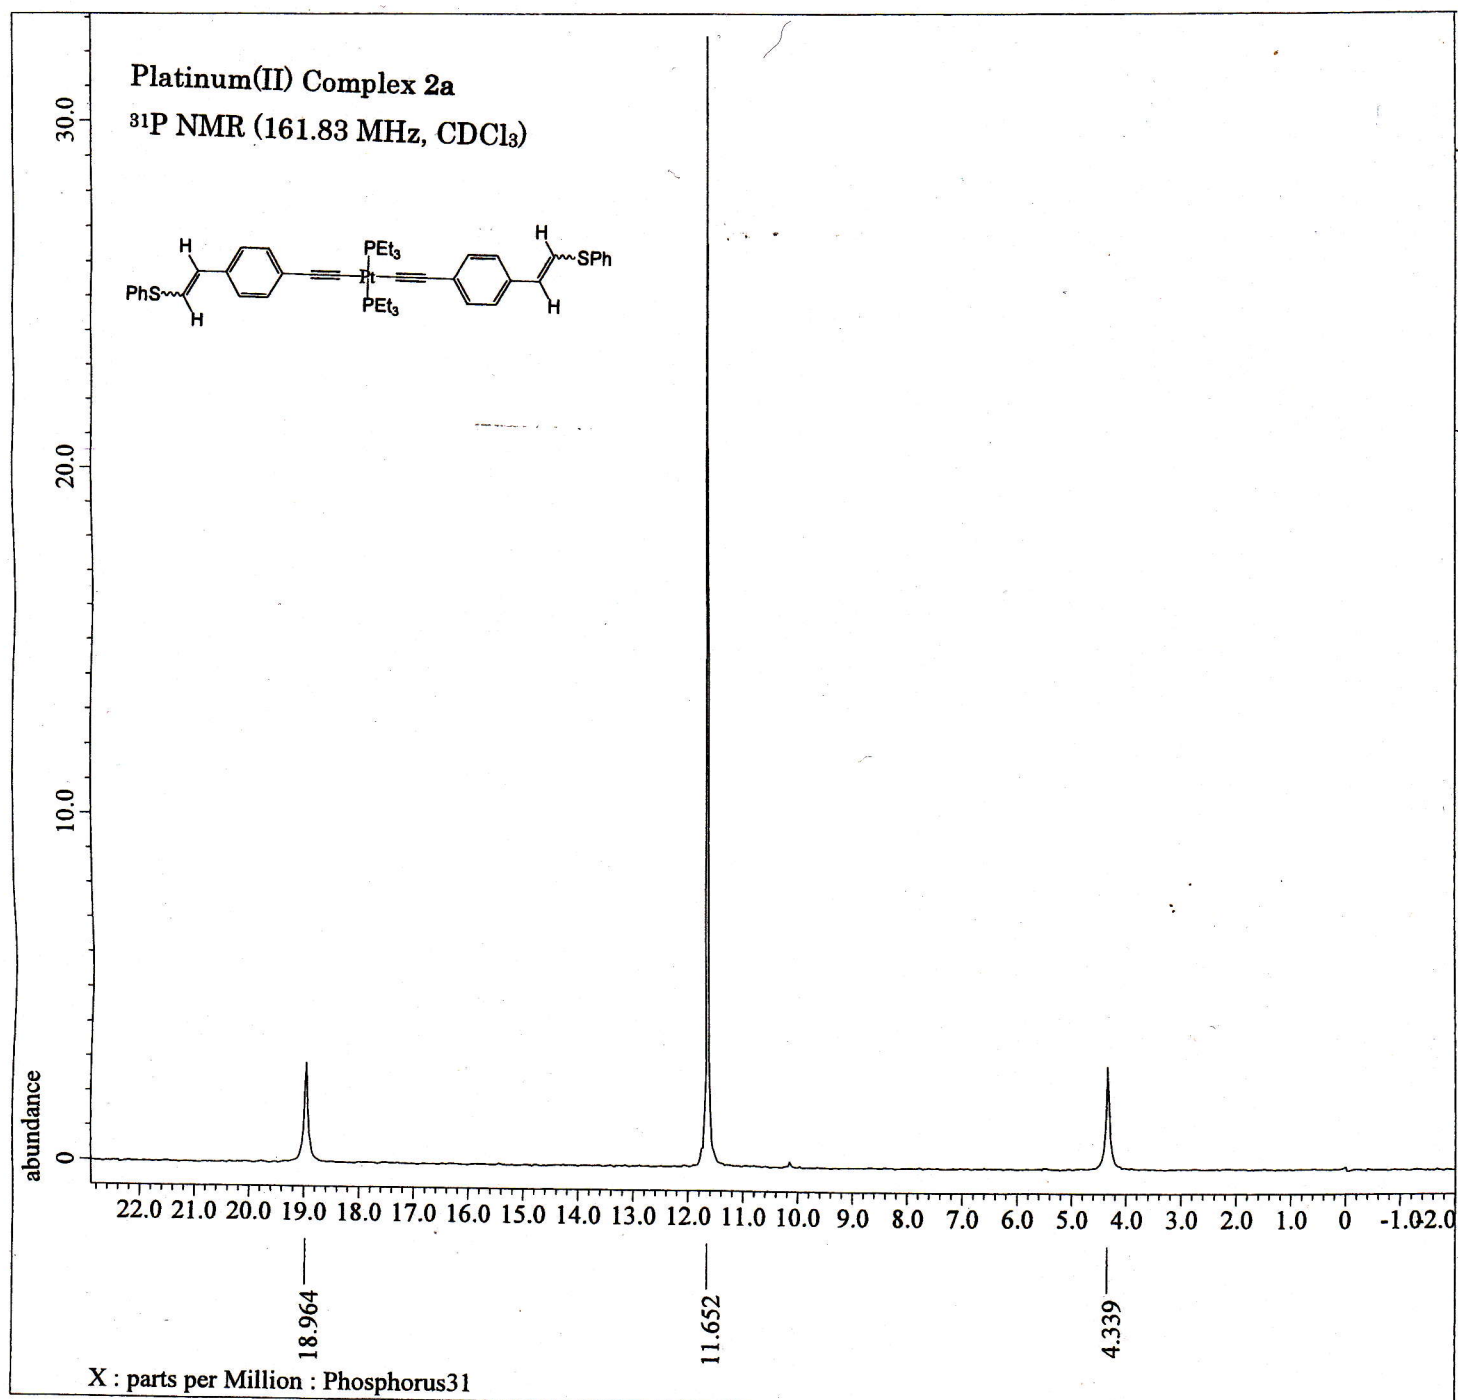

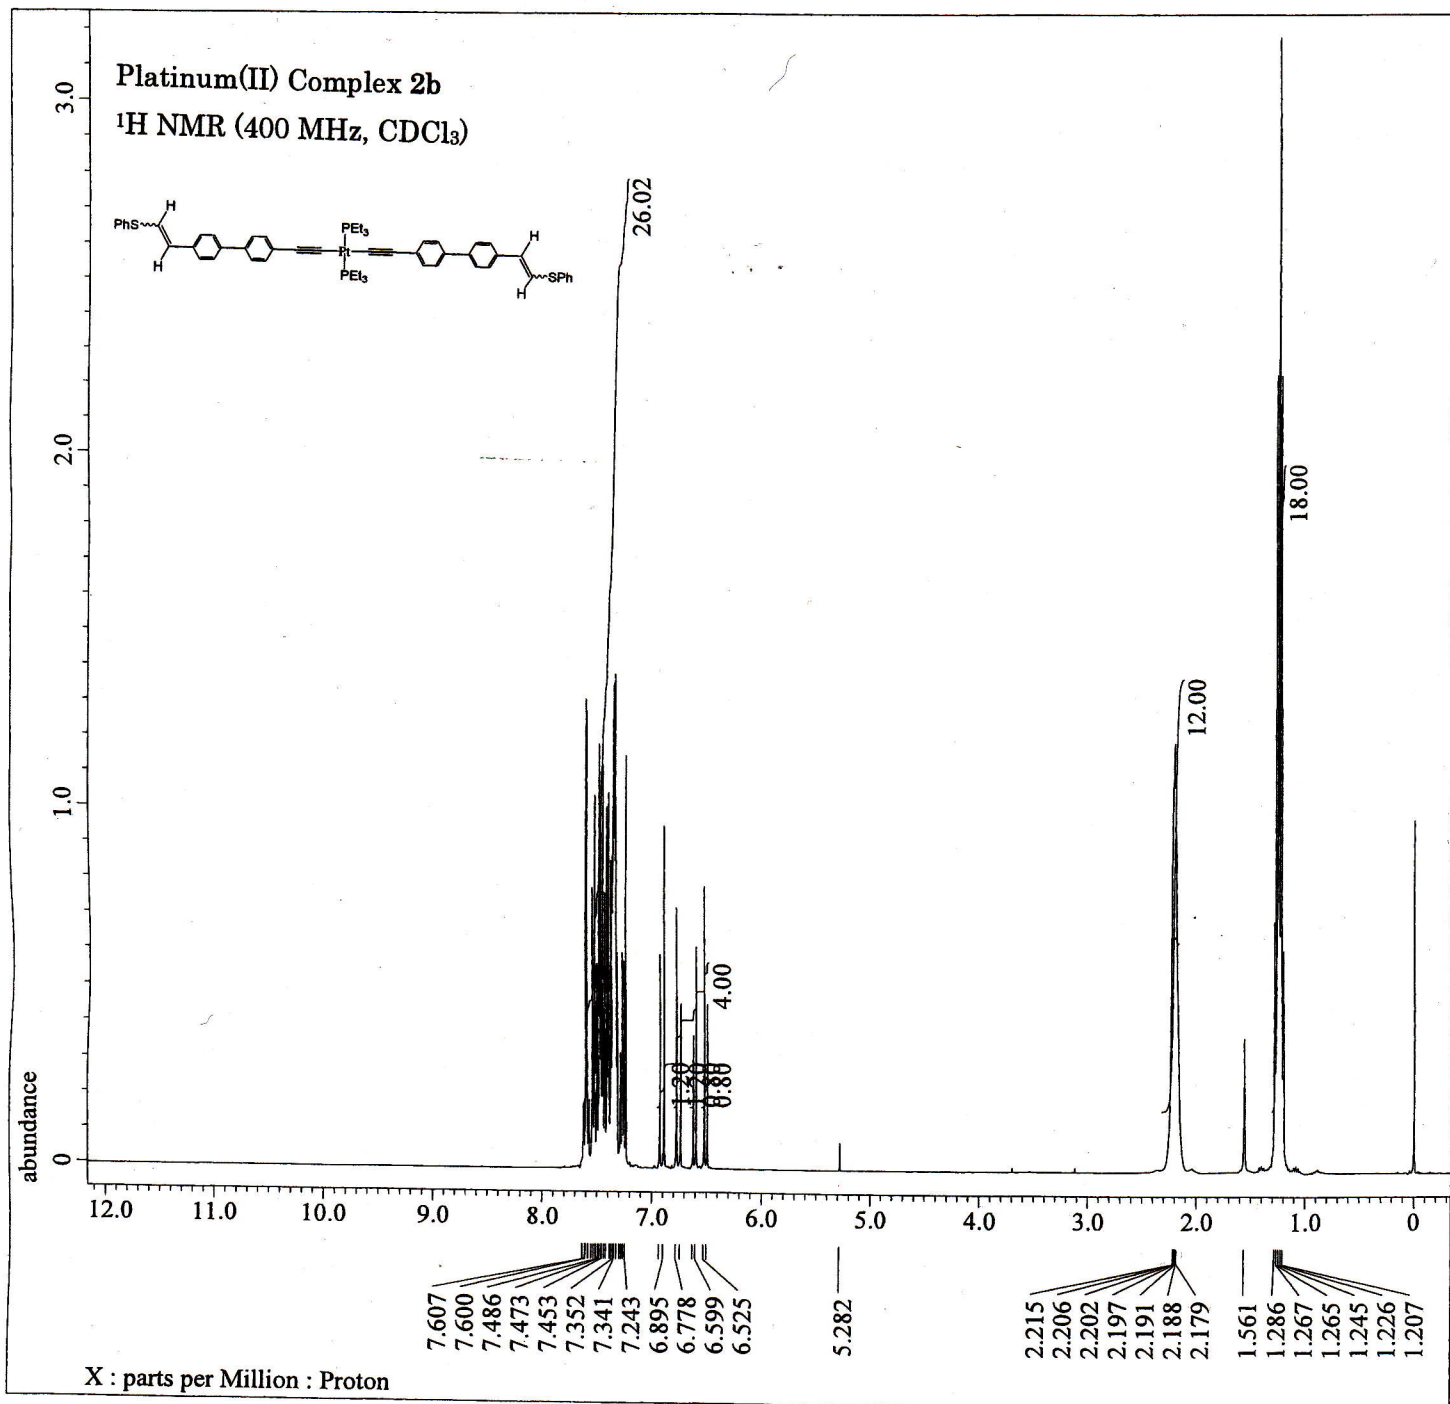

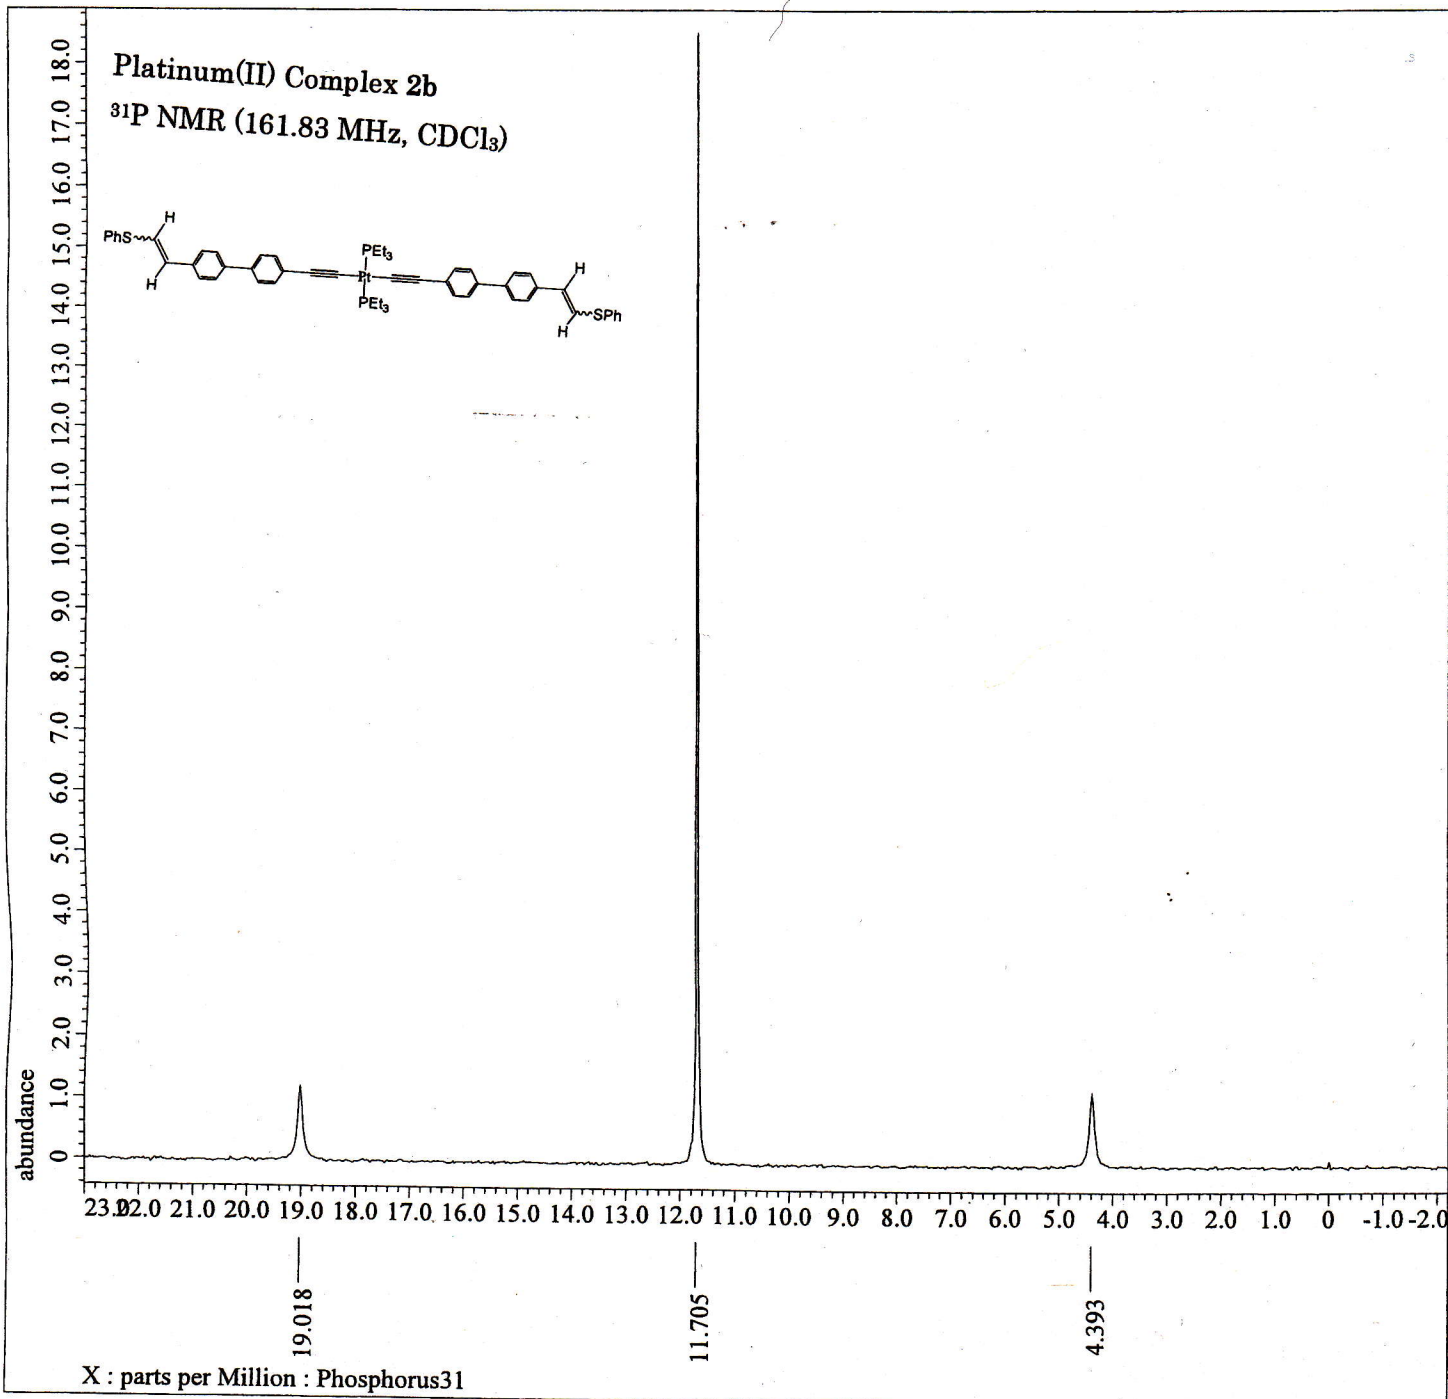

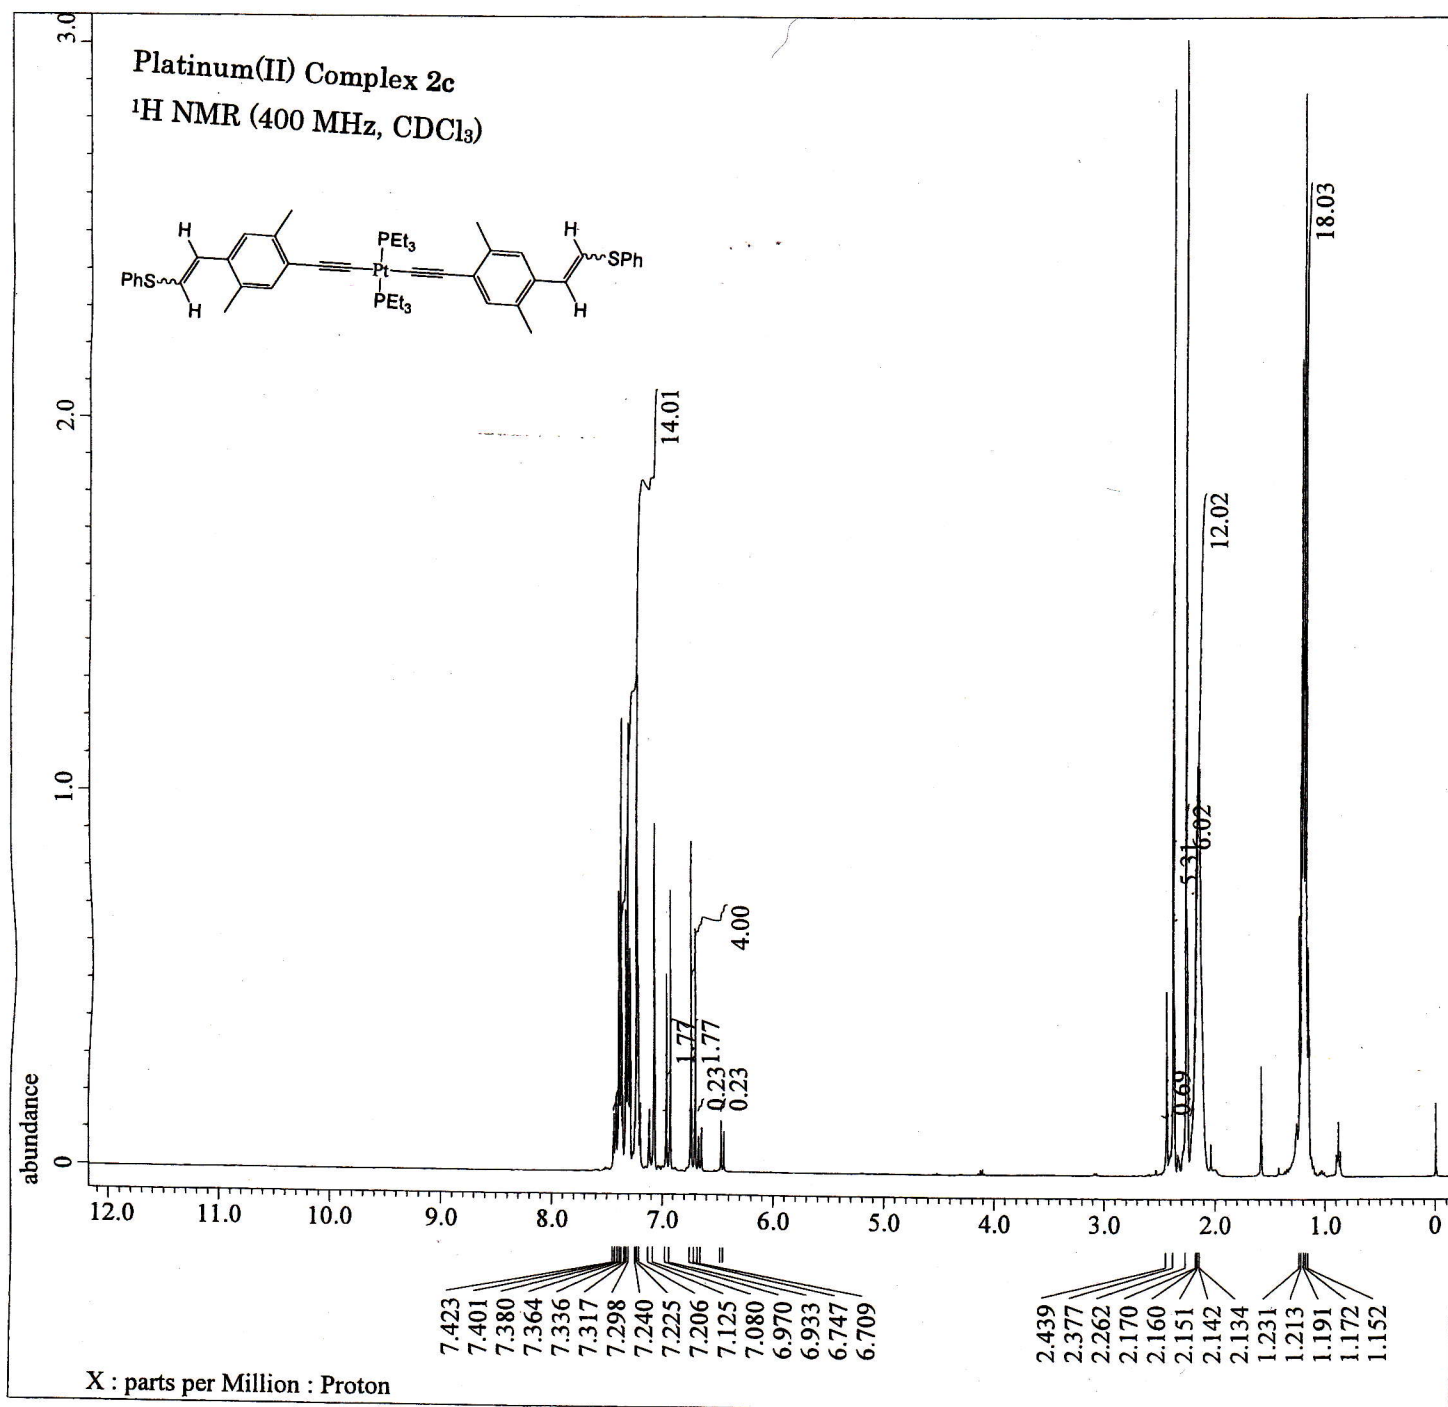



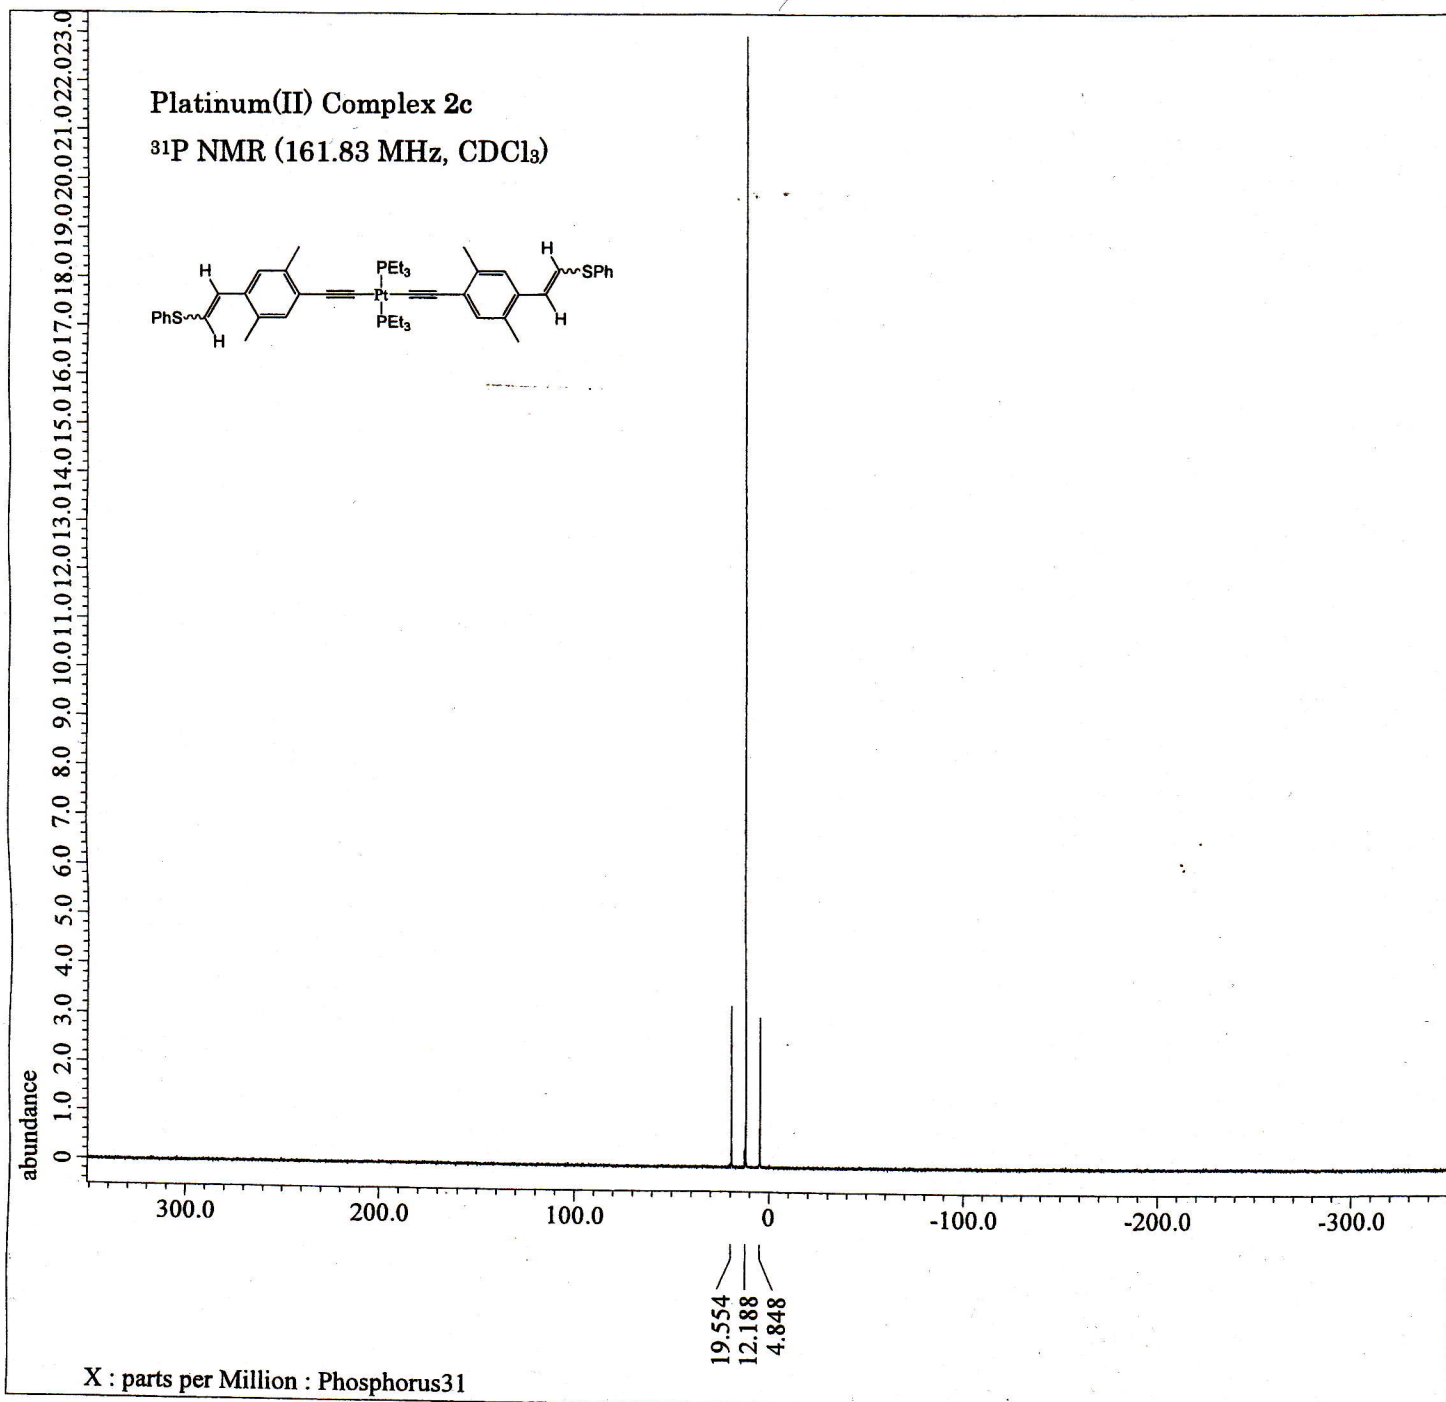

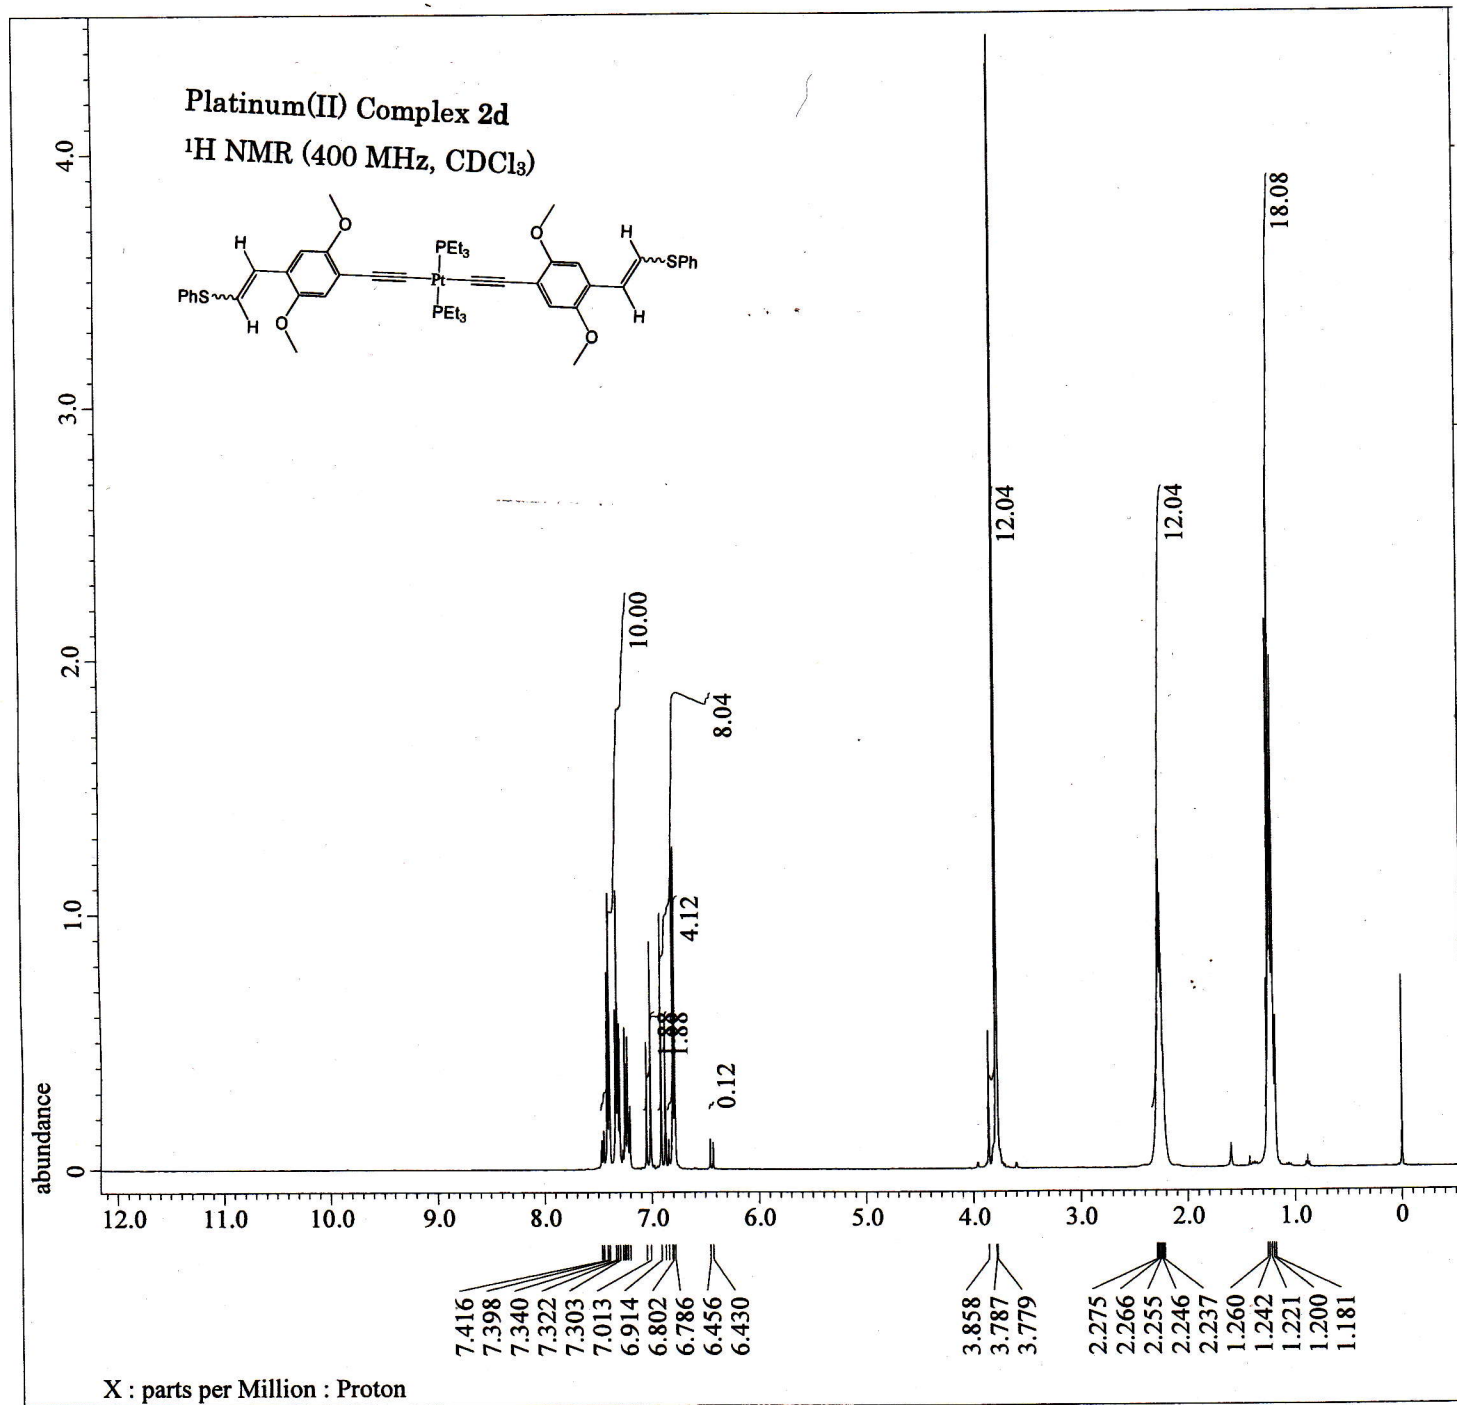

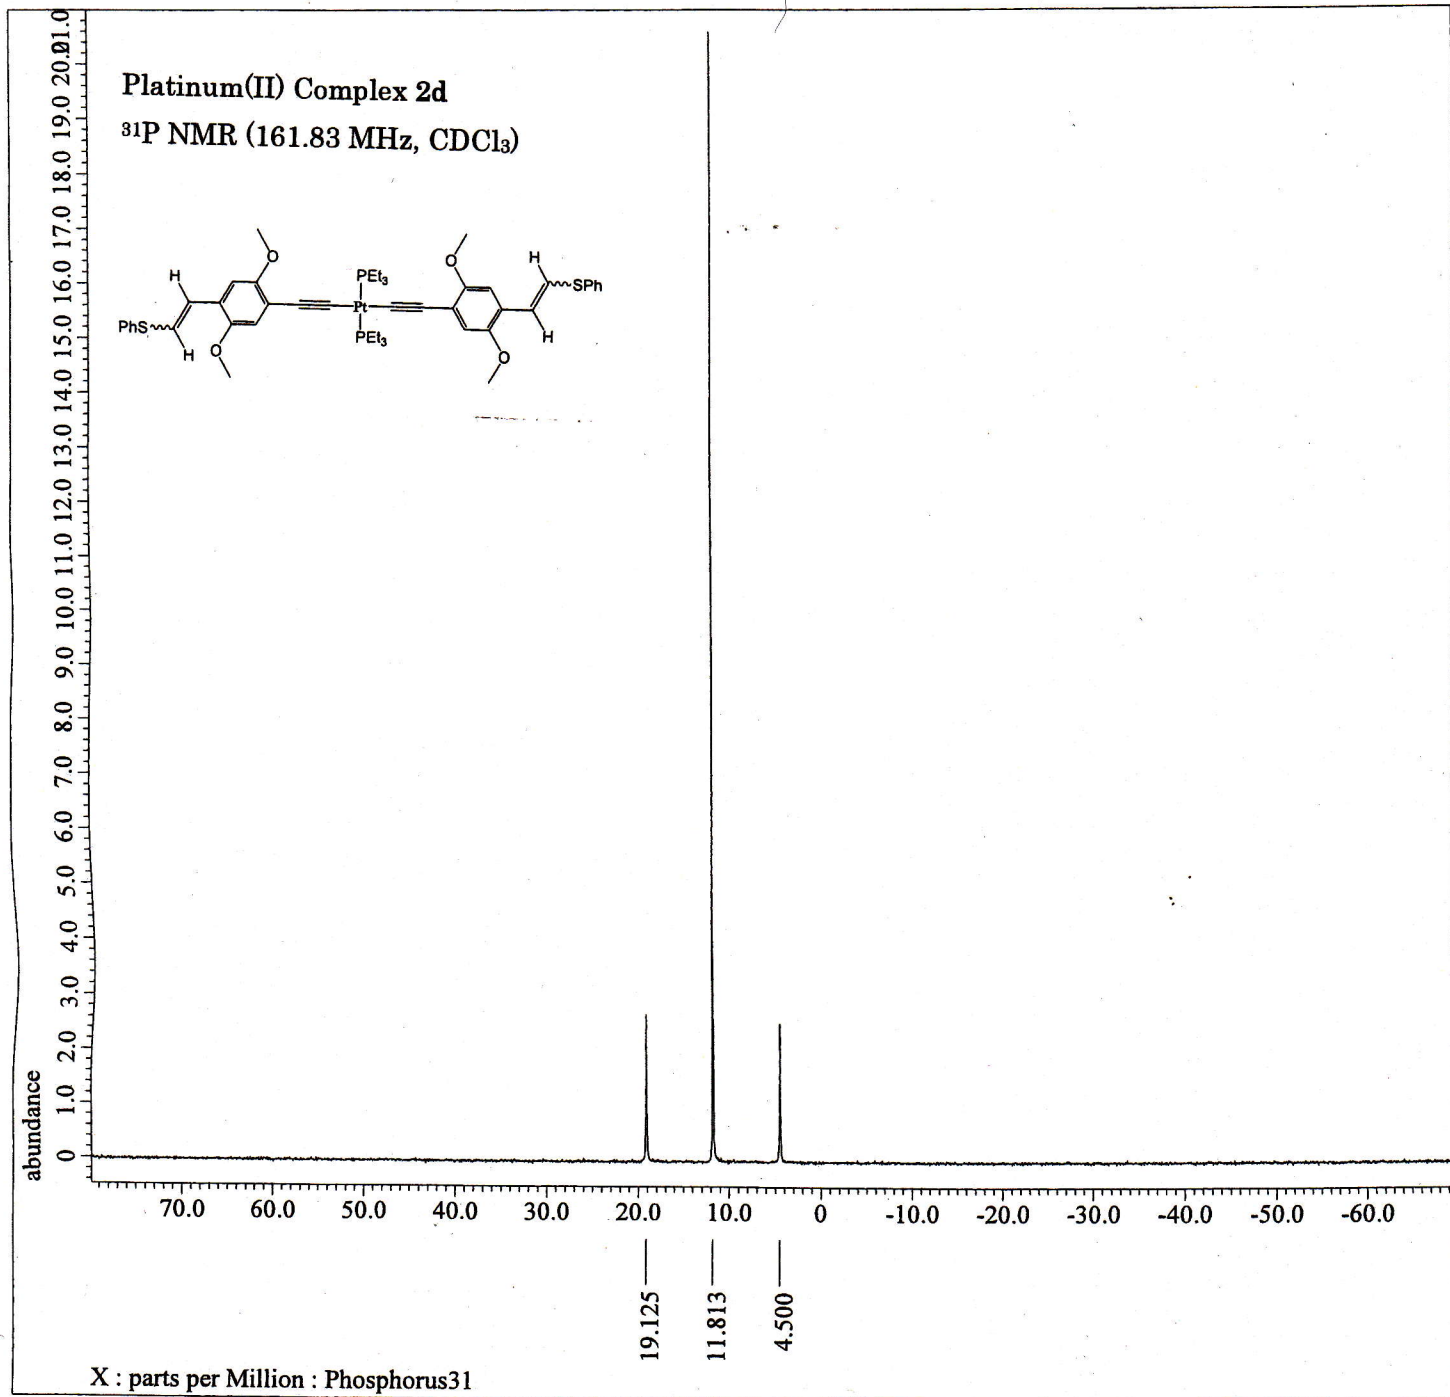

Supplement: c4ra01410c1.pdf [file c4ra01410c1.pdf]
